# Supplementary material
Source: PubMed Central journal article supplement (PMC3783096)
Supplement: supp_kwt097_kwt097_Web_Material.pdf [file supp_kwt097_kwt097_Web_Material.pdf]

## WEB MATERIAL

### Prediction of Severe Persistent Activity of Daily Living Disability in Older Adults

Dae Hyun Kim, Anne B. Newman, and Lewis A. Lipsitz

- Web Table 1.** List of Potential Predictors of Activity of Daily Living Dependence
- Web Table 2.** Cause-Specific Hazards Model for Severe Persistent Activity of Daily Living Dependence and Death in the Derivation Cohort, the Established Populations for Epidemiologic Studies of the Elderly, United States, 1981-1987 and 1985-1992
- Web Table 3.** Validation Studies of Risk Assessment Models and Frailty Indices for Community-Dwelling Older Adults
- Web Figure 1.** Calibration of the Cause-Specific Hazards Model in the Derivation and Validation Cohorts, the Established Populations for Epidemiologic Studies of the Elderly, United States, 1981-1987 and 1985-1992
- Web Figure 2.** Risk Category and 5-Year Risk of Hospitalization for Selected Conditions in the Validation Cohort, the Established Populations for Epidemiologic Studies of the Elderly, United States, 1981-1987 and 1985-1992

### References

**Web Table 1. List of Potential Predictors of Activity of Daily Living Dependence**

| <b>Domain</b>                                    | <b>Predictors (Response Category)</b>                                                                                                                                                                                                                                                                                                                                                                                                                                                                                                                                                                                                                                           |
|--------------------------------------------------|---------------------------------------------------------------------------------------------------------------------------------------------------------------------------------------------------------------------------------------------------------------------------------------------------------------------------------------------------------------------------------------------------------------------------------------------------------------------------------------------------------------------------------------------------------------------------------------------------------------------------------------------------------------------------------|
| Demographic characteristics                      | Age (< 70, 70-74, 75-79, ≥ 80 years)<br>Sex (male, female)<br>Race (African American race, otherwise)                                                                                                                                                                                                                                                                                                                                                                                                                                                                                                                                                                           |
| Socioeconomic status and support system          | Education (< 8, 8-11, ≥ 12 years)<br>Currently working at a paying job (yes, no)<br>Income level in the past year (< \$5,000, \$5,000-9,999, ≥ \$10,000)<br>Household composition (alone, spouse, others)                                                                                                                                                                                                                                                                                                                                                                                                                                                                       |
| Sensory impairment                               | Can hear and understand a normal voice in a quiet room (yes, no)<br>Read ordinary newspaper print (yes, no)                                                                                                                                                                                                                                                                                                                                                                                                                                                                                                                                                                     |
| Self-rated health, symptoms, and medical history | Self-rated health (excellent, good, fair, poor)<br>Weight loss more than 10 lbs in the past year (yes, no)<br>Chest pain on walking at an ordinary pace on level ground (yes, no)<br>Leg pain on walking (yes, no)<br>Shortness of breath requiring stop and rest (yes, no)<br>Felt that everything I did was an effort (yes, no)<br>Felt depressed (yes, no)<br>Diabetes mellitus (yes, no)<br>Ever had myocardial infarction (yes, no)<br>Ever had stroke or brain hemorrhage (yes, no)<br>Ever had a cancer (yes, no)<br>Ever fractured a hip (yes, no)<br>Number of hospitalization in the past year (none, 1, ≥ 2)<br>Ever stayed in a nursing home as a patient (yes, no) |
| Functional assessment and physical examination   | Cognitive function (normal, mild, moderate or severe) <sup>a</sup><br>Able to walk half a mile without help (yes, no)<br>Able to do heavy housework (yes, no)<br>Difficulty in pulling or pushing large objects (none, a little/some, a lot, unable to do)<br>Difficulty in writing or handling small objects (none, a little/some, a lot, unable to do)<br>Body mass index category (< 25, 25-29, ≥ 30 kg/m <sup>2</sup> )<br>Systolic blood pressure category (< 140, 140-159, ≥ 160 mmHg)                                                                                                                                                                                    |

<sup>a</sup> Cognitive function was classified as normal if the number of errors on the Short Portable Mental Status Questionnaire ≤ 2; mild if 3 or 4; and moderate to severe if ≥ 5 (of 9).(1)

**Web Table 2. Cause-Specific Hazards Model for Severe Persistent Activity of Daily Living Dependence and Death in the Derivation Cohort, the Established Populations for Epidemiologic Studies of the Elderly, United States, 1981-1987 and 1985-1992**

| Predictors                                        | Response Categories                | Event of Interest:<br>ADL Dependence |            | Competing Event:<br>Death without ADL Dependence |            |
|---------------------------------------------------|------------------------------------|--------------------------------------|------------|--------------------------------------------------|------------|
|                                                   |                                    | HR <sup>a</sup>                      | 95% CI     | HR <sup>a</sup>                                  | 95% CI     |
| Currently working at a paying job                 | No versus yes                      | 1.98                                 | 1.27, 3.09 | 1.19                                             | 0.98, 1.44 |
| Able to read ordinary newspaper print             | No versus yes                      | 1.45                                 | 1.18, 1.78 | 1.05                                             | 0.90, 1.22 |
| Self-rated health: (modified by age) <sup>b</sup> | Per each category increase         |                                      |            |                                                  |            |
| Age < 70 years                                    | (Excellent/good, fair, or poor)    | 1.78                                 | 1.40, 2.28 | 1.35                                             | 1.18, 1.54 |
| Age 70-74 years                                   |                                    | 1.47                                 | 1.25, 1.73 | 1.31                                             | 1.20, 1.43 |
| Age 75-79 years                                   |                                    | 1.21                                 | 1.07, 1.38 | 1.21                                             | 1.17, 1.38 |
| Age ≥ 80 years                                    |                                    | 1.00                                 | 0.84, 1.19 | 1.23                                             | 1.09, 1.39 |
| Diabetes mellitus                                 | Yes versus no                      | 1.35                                 | 1.09, 1.67 | 1.38                                             | 1.21, 1.57 |
| Ever had stroke or brain hemorrhage               | Yes versus no                      | 1.70                                 | 1.29, 2.24 | 1.42                                             | 1.18, 1.72 |
| Cognitive function <sup>c</sup>                   | Per each category increase         | 1.85                                 | 1.64, 2.08 | 1.26                                             | 1.16, 1.38 |
|                                                   | (Normal, mild, or moderate/severe) |                                      |            |                                                  |            |
| Able to walk half a mile                          | No versus yes                      | 1.61                                 | 1.33, 1.96 | 1.35                                             | 1.19, 1.53 |
| Able to do heavy housework                        | No versus yes                      | 1.47                                 | 1.21, 1.78 | 1.30                                             | 1.15, 1.46 |

Abbreviations: ADL, activity of daily living; CI, confidence interval; HR, hazard ratio.

<sup>a</sup> Age-stratified, cause-specific Cox models that included all predictors in the table and indicators for study sites were fitted for the event of interest (severe persistent ADL dependence) and competing event (death without severe persistent ADL dependence).

<sup>b</sup> The association between self-rated health and the outcome differed across age categories, representing a significant interaction ( $p < 0.001$ ).

<sup>c</sup> Cognitive function was classified as normal if the number of errors on the Short Portable Mental Status Questionnaire ≤ 2; mild if 3 or 4; and moderate to severe if ≥ 5 (of 9).(1)

**Web Table 3. Validation Studies of Risk Assessment Models and Frailty Indices for Community-Dwelling Older Adults**

| Model                | Operationalization of Frailty                      |                                                    |                                                                                           | Prediction of Functional Decline                                                      |                                                |                                                                               |
|----------------------|----------------------------------------------------|----------------------------------------------------|-------------------------------------------------------------------------------------------|---------------------------------------------------------------------------------------|------------------------------------------------|-------------------------------------------------------------------------------|
|                      | CHS Index(2, 3)                                    | SOF Index(2, 3)                                    | Frailty Index(4, 5)                                                                       | Sarkisian et al.(6)                                                                   | SPPB(7)                                        | VES – 13(8)                                                                   |
| <b>Predictors</b>    |                                                    |                                                    |                                                                                           |                                                                                       |                                                |                                                                               |
| <i>Self-Reported</i> | Weight loss<br>Exhaustion<br>Low physical activity | Weight loss<br>Reduced energy level                | Number of deficits of<br>20-40 symptoms,<br>signs, diseases, and<br>ADL/IADL disabilities | Benzodiazepine use<br>Low exercise level                                              | -                                              | Age, self-rated health<br>6 physical limitations,<br>5 ADL/IADL<br>dependence |
| <i>Measured</i>      | Grip strength<br>Gait speed                        | Chair stands                                       | Cognitive function                                                                        | Visual acuity < 20/40<br>BMI ≥ 29 kg/m <sup>2</sup><br>Depression scale<br>Gait speed | Standing balance<br>Gait speed<br>Chair stands | -                                                                             |
| <b>Population</b>    | Non-disabled men<br>and women                      | Non-disabled men<br>and women                      | Non-disabled,<br>disabled, and frail<br>men and women                                     | Disabled and non-<br>disabled women                                                   | Non-disabled men<br>and women                  | Frail men and women<br>with a geriatric<br>syndrome                           |
| <b>Outcome</b>       | Difficulty with IADLs,<br>fall, fracture, or death | Difficulty with IADLs,<br>fall, fracture, or death | Institutionalization or<br>death                                                          | Worsening ADL<br>dependence                                                           | Mobility disability plus<br>ADL dependence     | Decline in ADL/IADLs,<br>institutionalization, or<br>death                    |
| <b>Performance</b>   |                                                    |                                                    |                                                                                           |                                                                                       |                                                |                                                                               |
| <i>Calibration</i>   | NR                                                 | NR                                                 | NR                                                                                        | No lack of fit                                                                        | No lack of fit                                 | NR                                                                            |
| <i>C Statistic</i>   | 0.64-0.68*                                         | 0.64-0.68*                                         | NR                                                                                        | 0.76 <sup>†</sup>                                                                     | 0.69 <sup>‡</sup>                              | 0.75                                                                          |

Abbreviations: ADL, activity of daily living; BMI, body mass index; CHS, Cardiovascular Health Study; IADL, instrumental activity of daily living;

NR, not reported; SOF, Study of Osteoporotic Fractures; SPPB, Short Physical Performance Battery; VES, Vulnerable Elder Survey.

\* The model included age.

† The model included age, education, cognitive function, medical comorbidity, current smoking, and presence of spine fracture.

‡ The model included age, sex, and number of chronic conditions.

**Web Figure 1. Calibration of the Cause-Specific Hazards Model in the Derivation and Validation Cohorts, the Established Populations for Epidemiologic Studies of the Elderly, United States, 1981-1987 and 1985-1992<sup>a</sup>**

**A. Derivation Cohort (N = 8,301)**

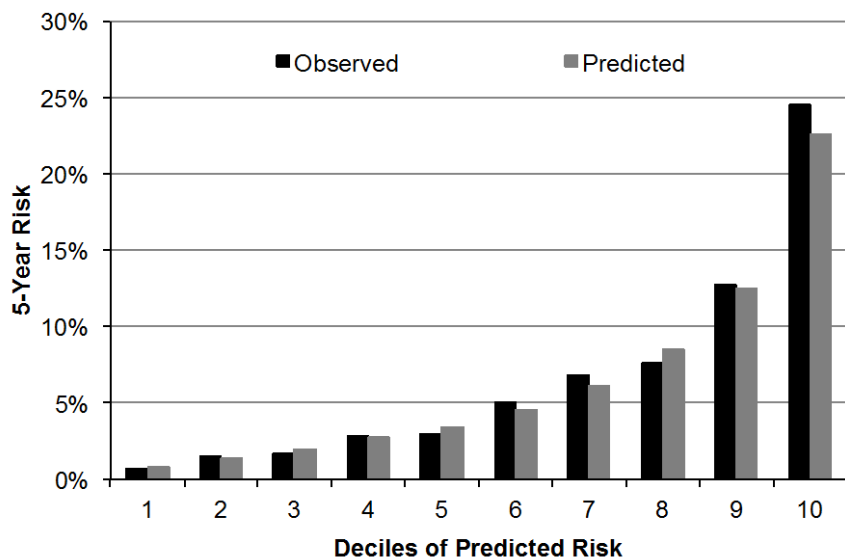

Goodness of Fit chi-square = 5.50; p=0.79

**B. Validation Cohort (N = 4,177)**

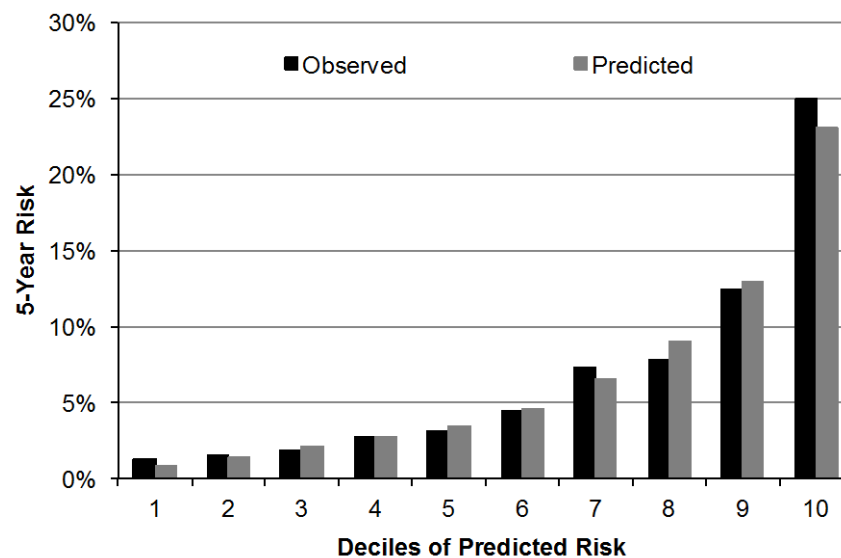

Goodness of Fit chi-square = 3.56, p=0.94

<sup>a</sup> The risk was estimated as the 5-year cumulative incidence of activity of daily living dependence from the cause-specific hazards model that accounted for competing risk.

**Web Figure 2. Risk Category and 5-Year Risk of Hospitalization for Selected Conditions in the Validation Cohort, the Established Populations for Epidemiologic Studies of the Elderly, United States, 1981-1987 and 1985-1992<sup>a</sup>**

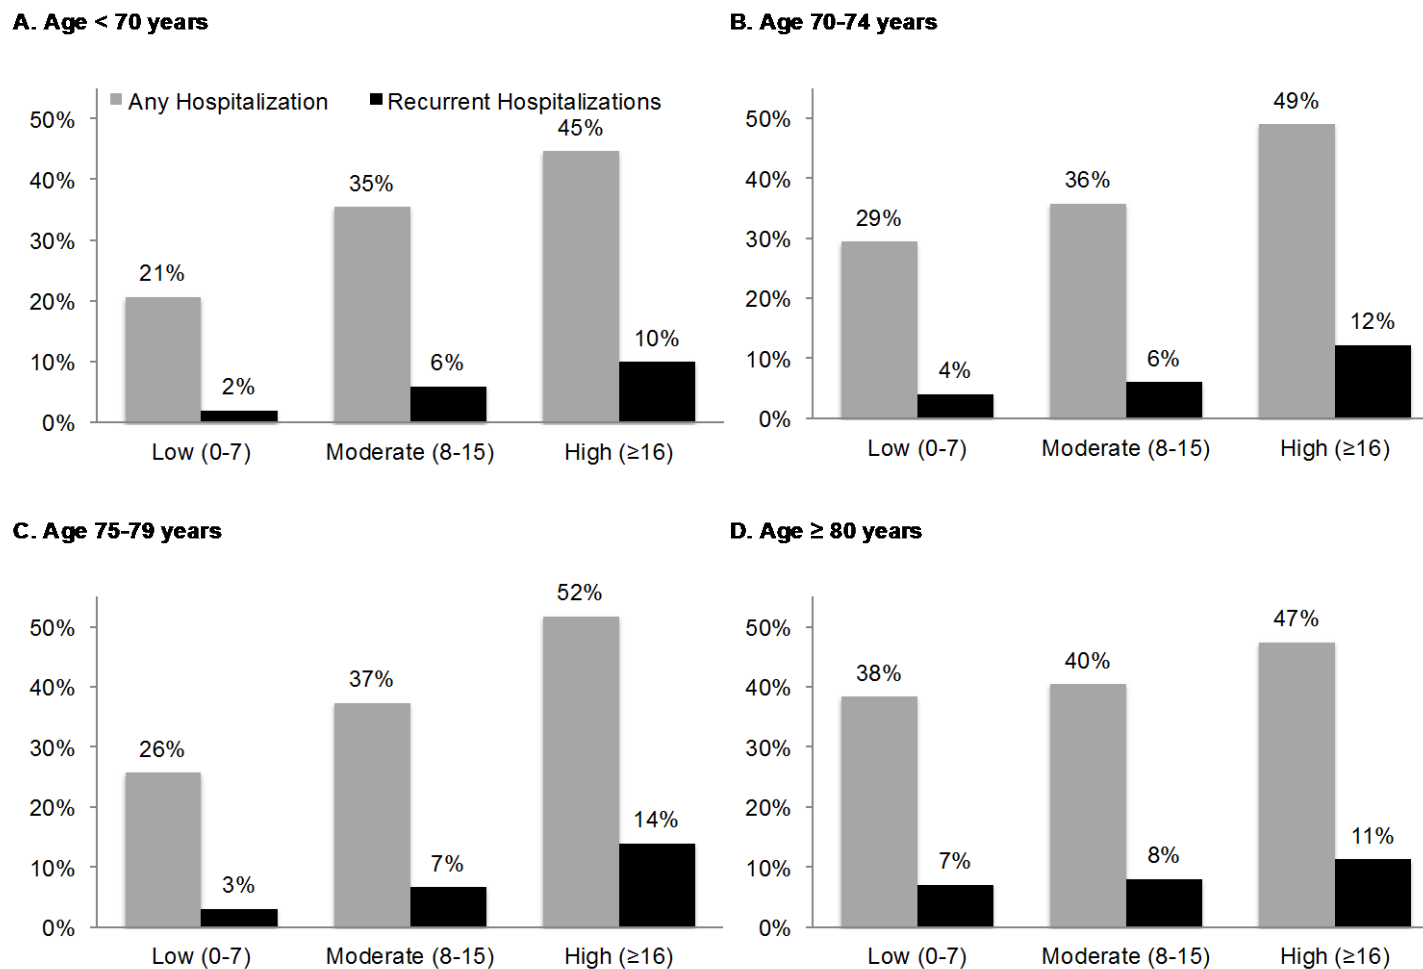

<sup>a</sup> The 5-year risk of any or recurrent hospitalizations for selected conditions (myocardial infarction, stroke, cancer, and fracture) was plotted against the risk category in the validation cohort.

## REFERENCES

1. Pfeiffer E. A short portable mental status questionnaire for the assessment of organic brain deficit in elderly patients. *J Am Geriatr Soc* 1975;23(10):433-441.
2. Ensrud KE, Ewing SK, Cawthon PM, et al. A comparison of frailty indexes for the prediction of falls, disability, fractures, and mortality in older men. *J Am Geriatr Soc* 2009;57(3):492-498.
3. Ensrud KE, Ewing SK, Taylor BC, et al. Comparison of 2 frailty indexes for prediction of falls, disability, fractures, and death in older women. *Arch Intern Med* 2008;168(4):382-389.
4. Mitnitski AB, Song X, Rockwood K. The estimation of relative fitness and frailty in community-dwelling older adults using self-report data. *J Gerontol A Biol Sci Med Sci* 2004;59(6):M627-632.
5. Rockwood K, Mitnitski A, Song X, et al. Long-term risks of death and institutionalization of elderly people in relation to deficit accumulation at age 70. *J Am Geriatr Soc* 2006;54(6):975-979.
6. Sarkisian CA, Liu H, Gutierrez PR, et al. Modifiable risk factors predict functional decline among older women: a prospectively validated clinical prediction tool. The Study of Osteoporotic Fractures Research Group. *J Am Geriatr Soc* 2000;48(2):170-178.
7. Guralnik JM, Ferrucci L, Pieper CF, et al. Lower extremity function and subsequent disability: consistency across studies, predictive models, and value of gait speed alone compared with the short physical performance battery. *J Gerontol A Biol Sci Med Sci* 2000;55(4):M221-231.

8. Saliba D, Elliott M, Rubenstein LZ, et al. The Vulnerable Elders Survey: a tool for identifying vulnerable older people in the community. *J Am Geriatr Soc* 2001;49(12):1691-1699.
